# Supplementary material for: The hidden land use cost of upscaling cover crops
Source: PubMed Central journal article supplement (PMC7289881; doi:10.1038/s42003-020-1022-1), 2020-06-11
Supplement: 42003_2020_1022_MOESM1_ESM.pdf [file 42003_2020_1022_MOESM1_ESM.pdf]

**Supplementary Data 1.** Yields and Seeding Rates of Commodity and Cover Crops and references for identifying cover crop seeding rates and yields which were identified from USDA statistics, extension reports, peer reviewed literature, and seed house catalogs.
